# Supplementary material for: Evaluating the appropriate oral lipid tolerance test model for investigating plasma triglyceride elevation in mice
Source: PLOS journal article supplement (doi:10.1371/journal.pone.0235875), 2020-10-06
Supplement: S1 (10.1371/journal.pone.0235875.s001) [file journal.pone.0235875.s001]

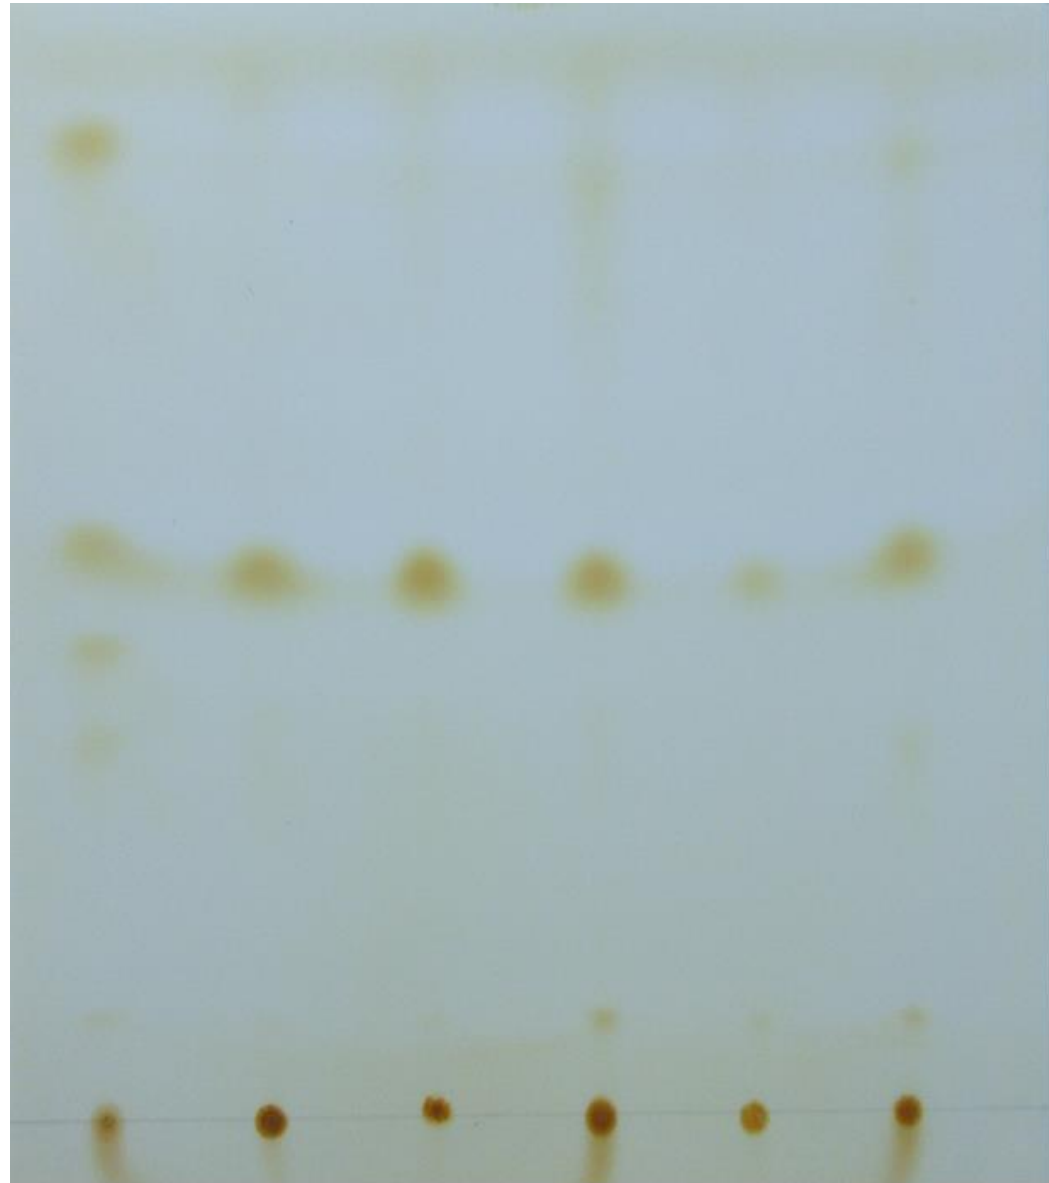

STD C1 C2 C3 C4 C5

**Control**

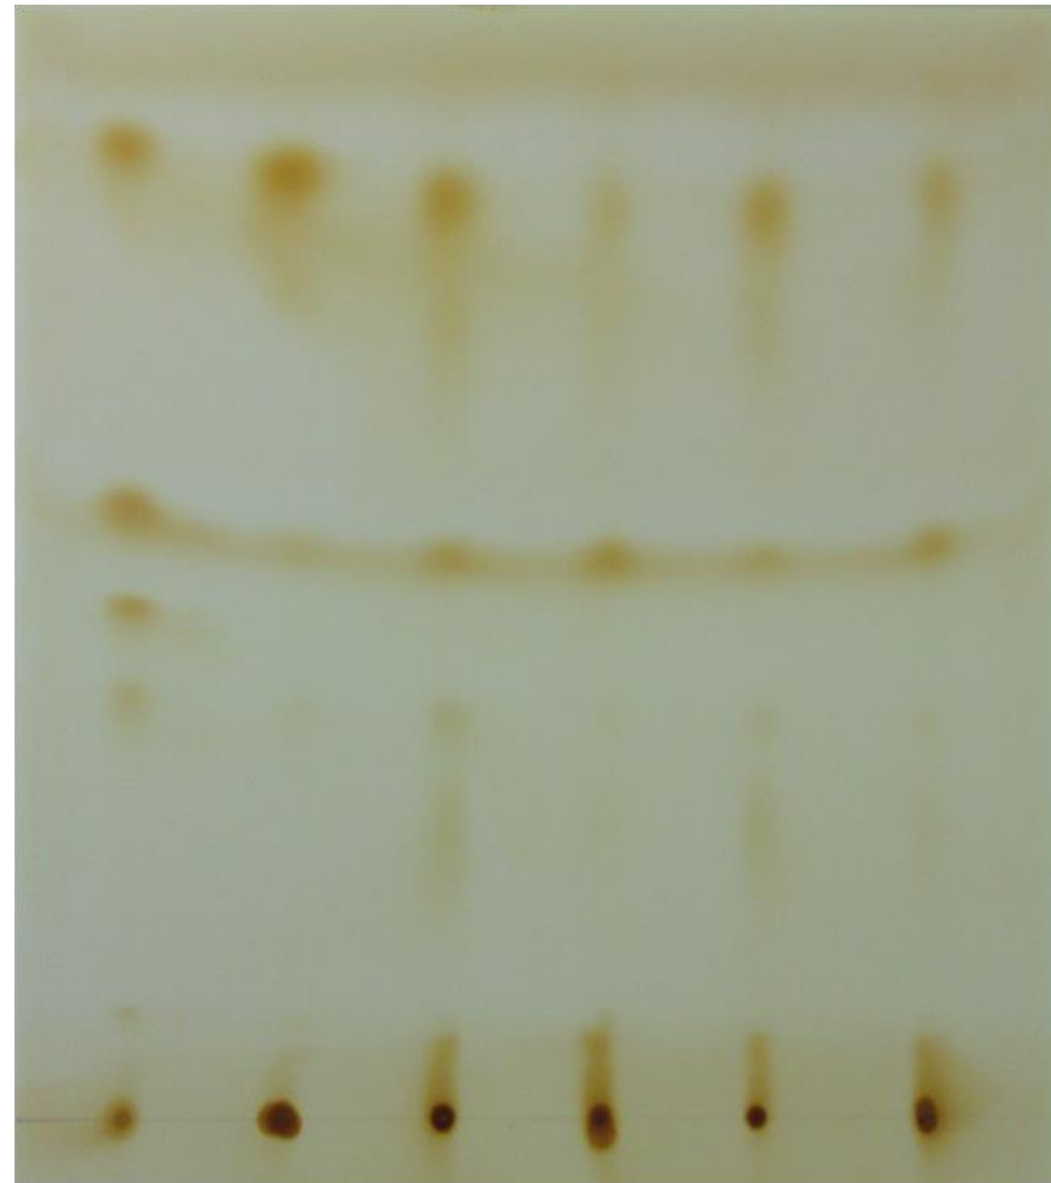

STD E1 E2 E3 E4 E5

**EGCG**

← TG

← FA

← DG

← MG

← Origin
